# Supplementary material
Source: HighWire-hosted journal article supplement (https://erj.ersjournals.com/highwire/filestream/127851/field_highwire_adjunct_files/0/ERJ-01170-2015_Supplementary_Information.pdf)
Supplement: ERJ-01170-2015_Supplementary_Information.pdf [file ERJ-01170-2015_Supplementary_Information.pdf]

# A Review of Available National Guidelines of Treatment of COPD in Europe

## Supplementary Information

**Authors:** Marc Miravittles,<sup>1</sup> Claus Vogelmeier,<sup>2</sup> Nicolas Roche,<sup>3</sup> David Halpin,<sup>4</sup> João Cardoso,<sup>5</sup> Alexander G Chuchalin,<sup>6</sup> Hannu Kankaanranta,<sup>7</sup> Thomas Sandström,<sup>8</sup> Paweł Śliwiński,<sup>9</sup> Jaromir Zatloukal,<sup>10</sup> Francesco Blasi<sup>11</sup>

**Table S1. Influence of Comorbidities on COPD Treatment Decisions**

| Country        | Ischemic Heart Disease                 | Heart Failure                                                       | Atrial Fibrillation                    | Hypertension | Diabetes                    | Osteoporosis                       | Lung Cancer | Obstructive Sleep Apnea | Renal Disease | Other                                                                      |
|----------------|----------------------------------------|---------------------------------------------------------------------|----------------------------------------|--------------|-----------------------------|------------------------------------|-------------|-------------------------|---------------|----------------------------------------------------------------------------|
| Czech Republic | Not stated                             | Not stated                                                          | Not stated                             | Not stated   | Not stated                  | Not stated                         | Not stated  | Not stated              | Not stated    | Not stated                                                                 |
| England        | NO                                     | NO                                                                  | NO                                     | NO           | NO                          | NO                                 | NO          | NO                      | NO            | -                                                                          |
| Finland        | Careful consideration of LABA use      | Careful consideration of LABA use                                   | NO                                     | NO           | Increased risk with ICS/OCS | Increased risk with ICS/OCS        | NO          | NO                      | NO            | Pneumonia: avoid prescribing ICS outside current indications for COPD      |
| France         | NO                                     | NO                                                                  | NO                                     | NO           | NO                          | NO                                 | NO          | NO                      | NO            | -                                                                          |
| Germany        | NO                                     | NO                                                                  | NO                                     | NO           | NO                          | NO                                 | NO          | NO                      | NO            | -                                                                          |
| Italy          | NO                                     | NO                                                                  | NO                                     | NO           | NO                          | NO                                 | NO          | NO                      | NO            | -                                                                          |
| Poland         | NO                                     | NO                                                                  | NO                                     | NO           | NO                          | NO                                 | NO          | NO                      | NO            | -                                                                          |
| Portugal       | NO                                     | NO                                                                  | NO                                     | NO           | NO                          | NO                                 | NO          | NO                      | NO            | -                                                                          |
| Russia         | Avoid high doses of $\beta_2$ agonists | Close follow-up of patients taking high doses of $\beta_2$ agonists | Avoid high doses of $\beta_2$ agonists | NO           | NO                          | Use systemic steroids with caution |             | Provide CPAP therapy    |               | Special attention to rehabilitation in patients with anxiety or depression |
| Spain          | NO                                     | NO                                                                  | NO                                     | NO           | NO                          | NO                                 | NO          | NO                      | NO            | -                                                                          |
| Sweden         | NO                                     | NO                                                                  | NO                                     | NO           | NO                          | NO                                 | NO          | NO                      | NO            | -                                                                          |

CPAP, continuous positive airway pressure; ICS: inhaled corticosteroids; OCS: oral corticosteroids

**Table S2. Issues and Questions**

- Issues that should be addressed:
  - The target audience(s) for guidelines should be clearly delineated.
  - Recommendations should increase suspicion of COPD among primary care physicians who are usually the first to encounter at-risk patients.
  - Assessment of disease severity and establishment of prognosis should be based on multiple factors, including exacerbation history, symptoms (including activity limitation), and pulmonary function.
  - Delineation of current disease activity (stable vs. unstable disease).
  - Measures used for patient stratification must be sensitive to treatments.
  - Better guidance is needed for stepping up or down patient treatment intensity.
  - Definition of disease progression.
  - SABAs and SAMAs should not be employed as regular treatment for symptomatic individuals with COPD; long-acting bronchodilators are needed in such patients.
  - Both potential risks and benefits should guide selection of treatments.
  - Guidelines should be updated regularly to keep pace with research.
- Question that require further research:
  - There are distinct constellations of patient characteristics that may be useful for establishment of prognosis and guiding treatment selection, but it is not clear whether they should be considered as permanent phenotypes, or how they should guide treatment longitudinally (step up/down).
  - More information is needed about the long-term efficacy and safety of LABA + LAMA combinations vs. single agents and it is most important to understand their efficacy on symptoms and exacerbations.
  - Identification of responders to ICS and patients that can safely discontinue ICS.
  - More data on the role of other pharmacologic treatments, i.e. mucolytics, macrolides in frequent exacerbators.
